# Supplementary material for: The auto-inhibitory domain and ATP-independent microtubule-binding region of Kinesin heavy chain are major functional domains for transport in the Drosophila germline
Source: PubMed Central journal article supplement — Development. 2014 Jan 1;141(1):176–86. doi: 10.1242/dev.097592 (PMC3865757; doi:10.1242/dev.097592), 2014-01-01
Supplement: supp_dev.097592_DEV097592.pdf [file supp_dev.097592_DEV097592.pdf]

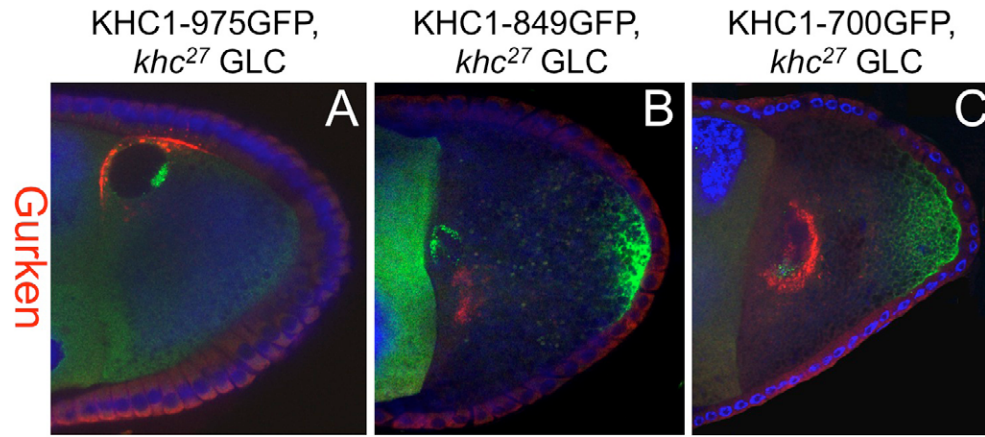

**D**

| Gurken localization                            | Dorsal crescent |
|------------------------------------------------|-----------------|
| <i>khc<sup>27</sup></i> GLC; KHC1-975/+ (n=20) | 100%            |
| <i>khc<sup>27</sup></i> GLC; KHC1-849/+ (n=56) | 14%*            |
| <i>khc<sup>27</sup></i> GLC; KHC1-700/+ (n=7)  | 0%*             |
| <i>khc<sup>27</sup></i> GLC (n=27)             | 4%              |
| <i>khc<sup>27</sup></i> GLC; KHC1-938/+ (n=20) | 45%             |

**Fig. S1. The tail of KHC is important for Gurken localization.** (A-C) Gurken in st9 *khc<sup>27</sup>* mutant oocytes (GLC) containing KHC-GFP transgenes. A) KHC1-975 rescues Gurken localization, to a crescent at the anterior-dorsal corner, associated with the nucleus. B,C) KHC1-849 and KHC1-700 are unable to correctly localize Gurken protein to the nucleus (note that the nucleus is in contact with the anterior membrane (well positioned), but that the view axis is rotated 90 degrees). DAPI is in blue. D) Table showing quantification of the Gurken localization phenotype.\*The statistical value between KHC1-700 and KHC1-849 is P (one-tailed) <0.0001

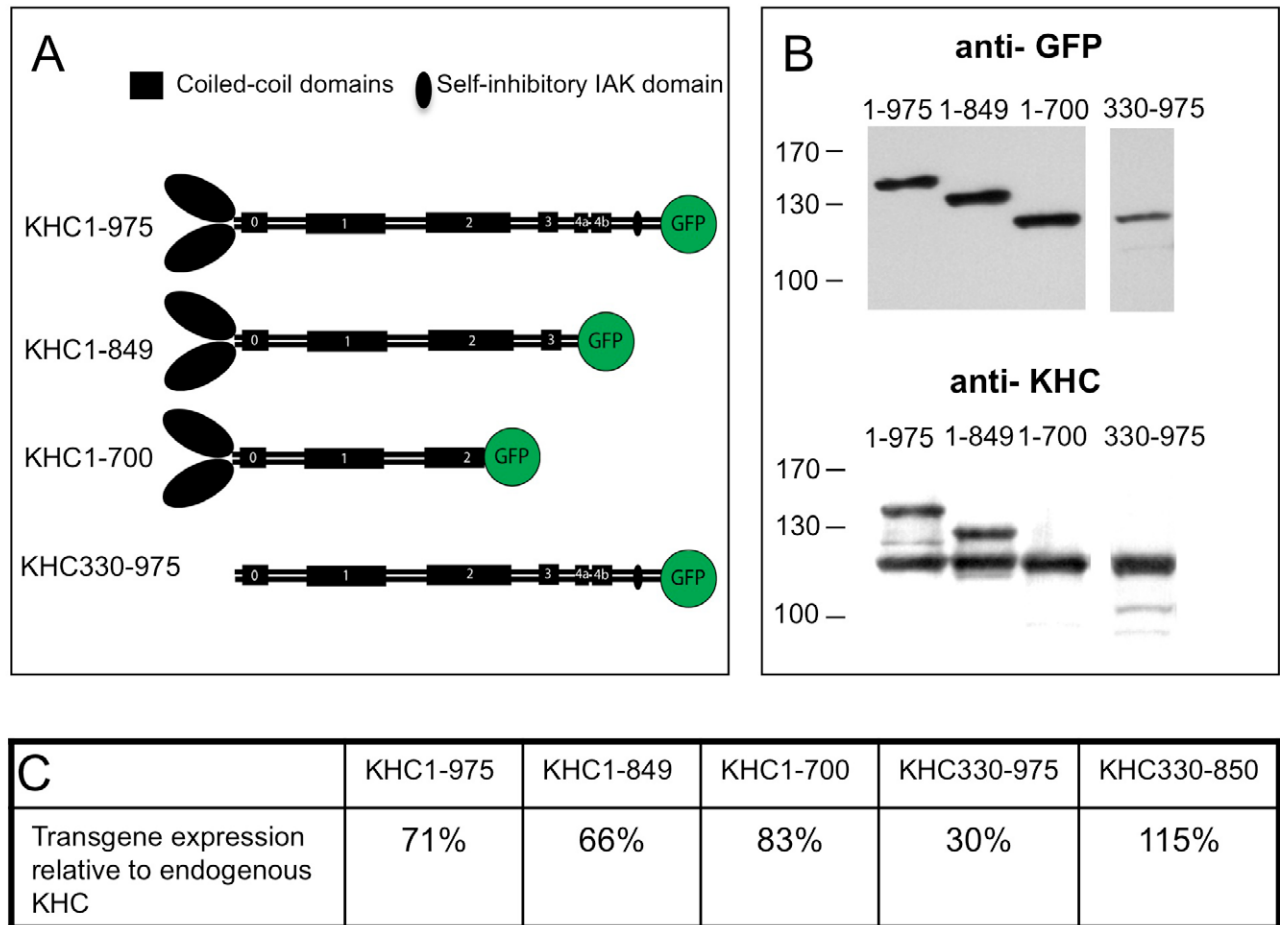

**Fig. S2. KHC transgenes and their expression levels *in vivo*.** (A) Schematic of KHCs, coiled-coils are numbered 0 to 4a/4b, the IAK motif is shown by an oval. B) Western blots showing relative expression levels of the KHC transgenes. Top panel shows a blot against GFP, bottom panel shows a blot against KHC. Relative expression of KHC1-975 and KHC1-849 was calculated directly from anti-KHC blot. All other values were taken relative to KHC1-975GFP. C) Table showing relative expression levels of KHCs.

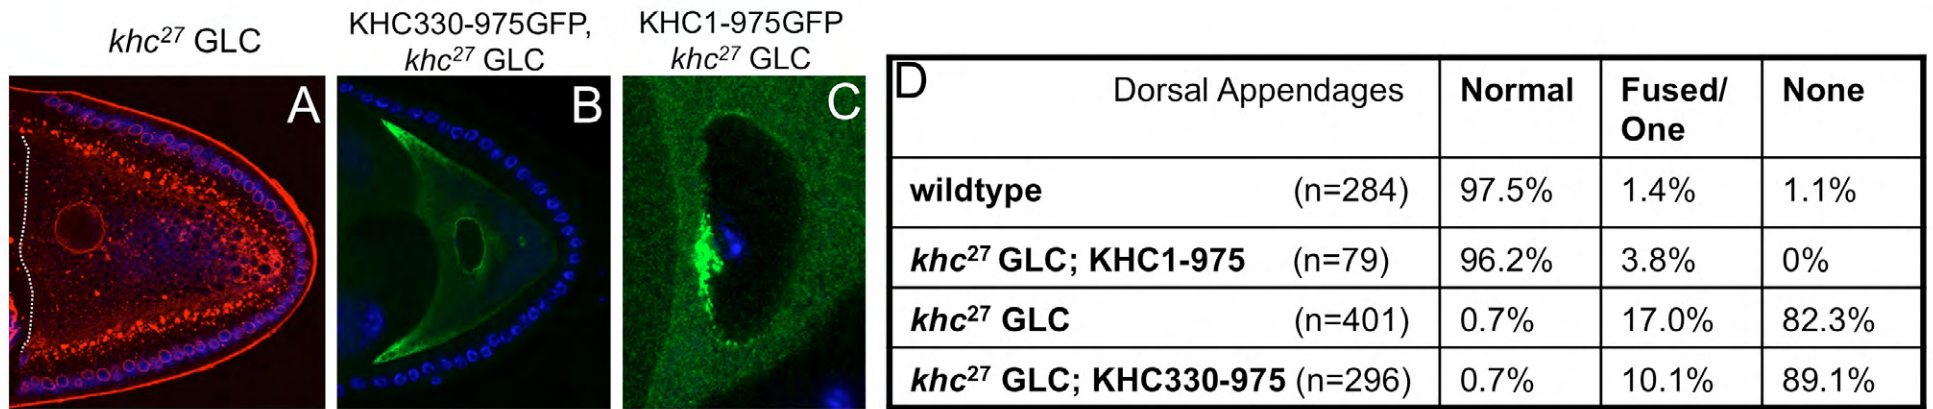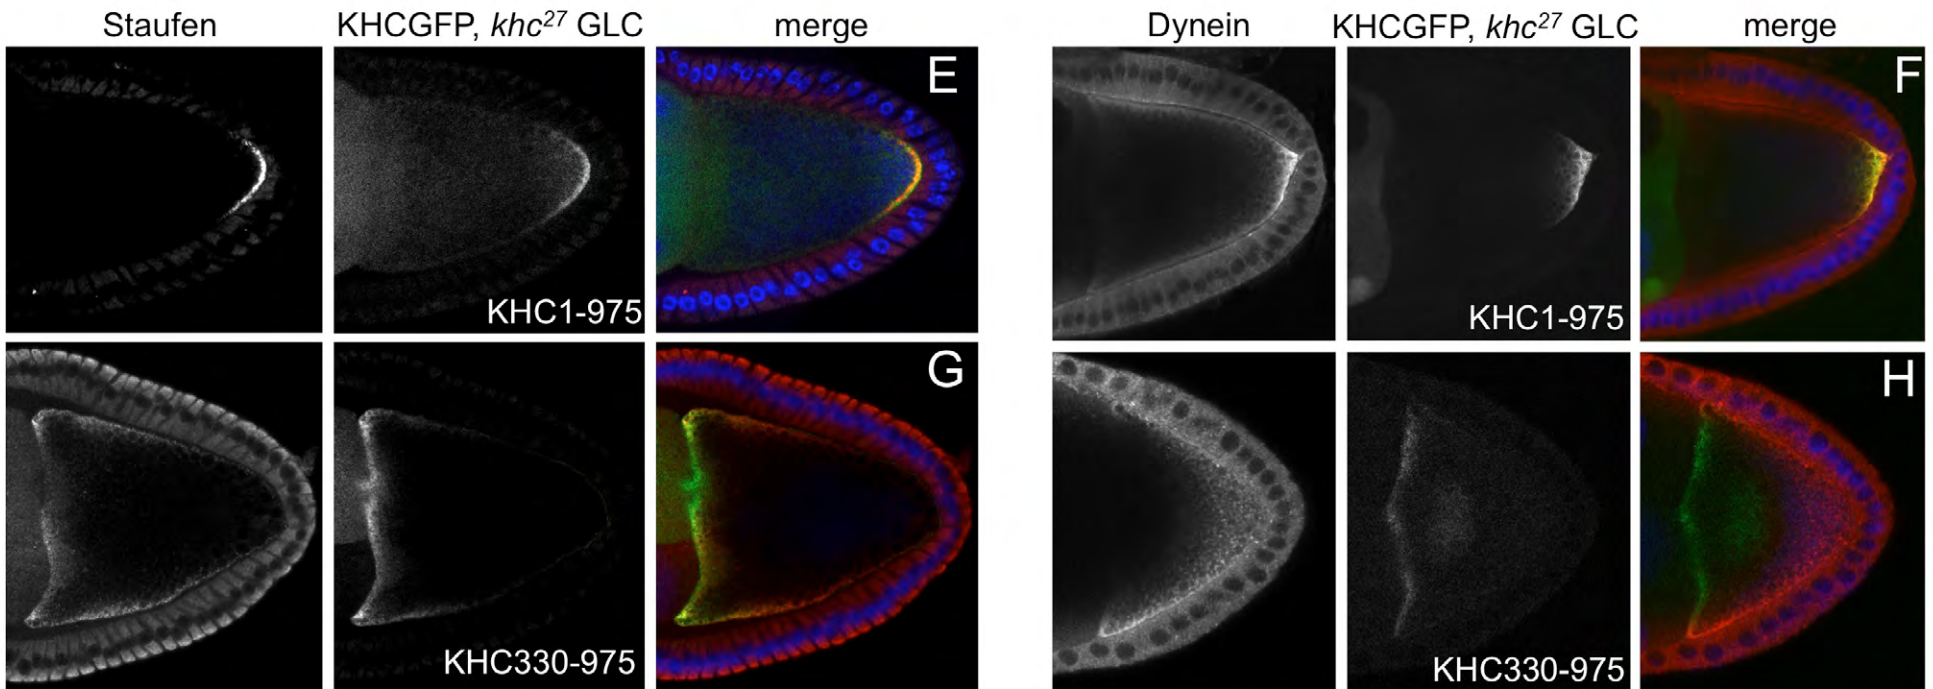

**Fig. S3. The motor domain is essential for KHC function in the oocyte.** (A,B) Nucleus positioning phenotypes in *khc*<sup>27</sup> mutants (GLC) without (A, membrane stained with WGA in red) or with KHC330-975GFP (B). C) Image of a KHC1-975GFP oocyte nucleus showing both punctate localization and localization of KHC1-975GFP to the nuclear membrane. D) Table showing the DA phenotypes of eggs laid by mutant females of the indicated phenotypes. The phenotype of KHC330-975 eggs is stronger than that of the *khc* null. E-H) Staufen or Dynein (red in right panels, white in left panels) in *st9 khc*<sup>27</sup> mutant oocytes (GLC) containing KHCs (green in right panels, white in middle panels). E,F) A full length KHC330-975 rescues the posterior localization of Staufen and Dynein. A motorless KHC cannot transport Staufen (G) or Dynein (H) to the posterior. A-C,E-H) DAPI (DNA, blue).

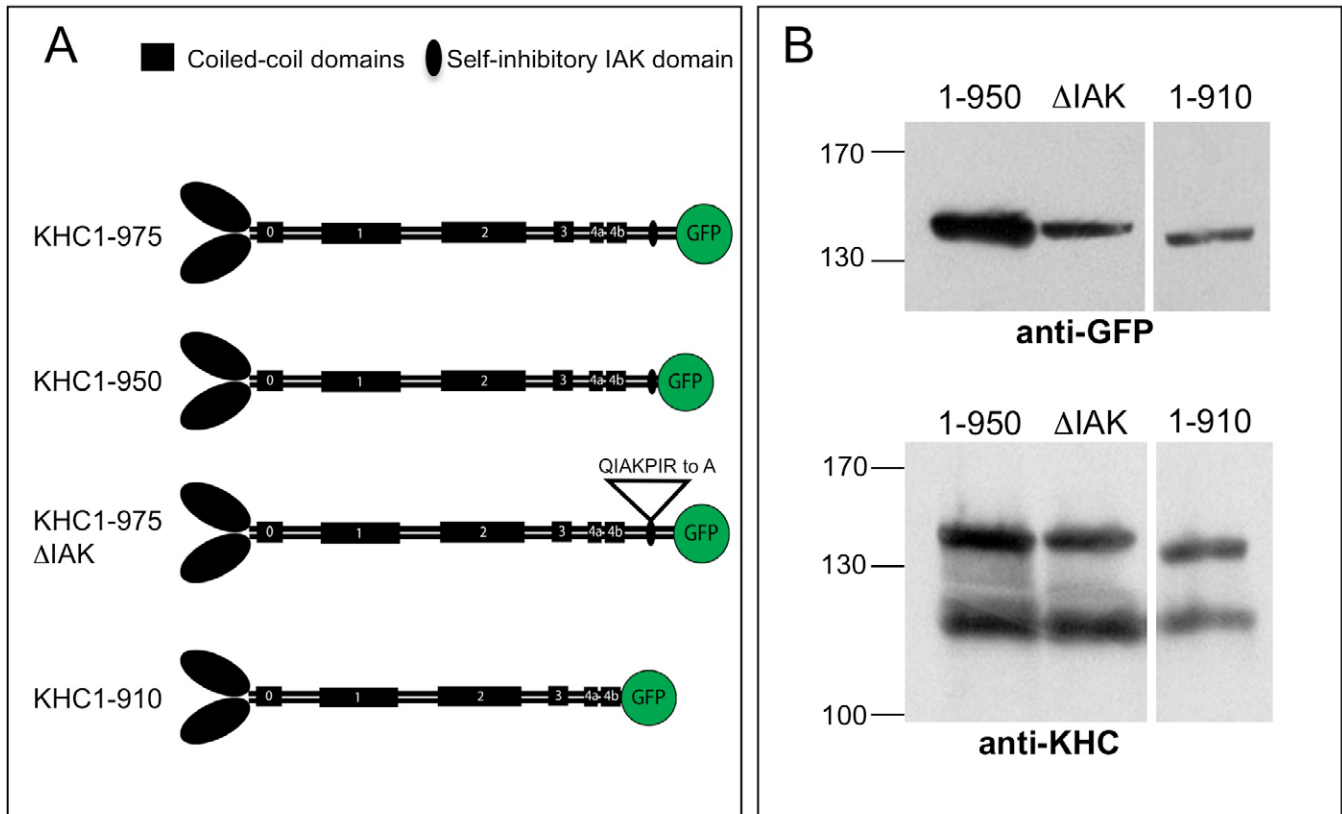

| <b>C</b>                                        | KHC1-975 | KHC1-950 | KHCΔIAK | KHC1-910 |
|-------------------------------------------------|----------|----------|---------|----------|
| Transgene expression relative to endogenous KHC | 70%      | 100%     | 60%     | 90%      |

| <b>D</b>                                        | Staufen: | Normal | Dot/Crescent |
|-------------------------------------------------|----------|--------|--------------|
| + / + ; KHC1-975ΔIAK / +                        | (n=42)   | 45%    | 55%          |
| <i>khc</i> <sup>27</sup> / + ; KHC1-975ΔIAK / + | (n=45)   | 24%    | 76%          |
| <i>khc</i> <sup>27</sup> GLC ; KHC1-975ΔIAK / + | (n=34)   | 3%     | 97%          |

**Fig. S4. KHC tail mutant transgenes and their expression levels *in vivo*.** (A) Schematic of KHC transgenes, coiled-coils are numbered 0 to 4a/4b, the IAK motif is shown by an oval. (B) Western blots showing relative expression levels of the KHCs. Top panel shows a blot against GFP, bottom panel shows a blot against KHC. (C) Table showing relative expression levels of KHCs calculated directly from anti-KHC blot. (D) Quantification of the KHC1-975ΔIAK Staufen phenotype in the presence and absence of endogenous KHC.

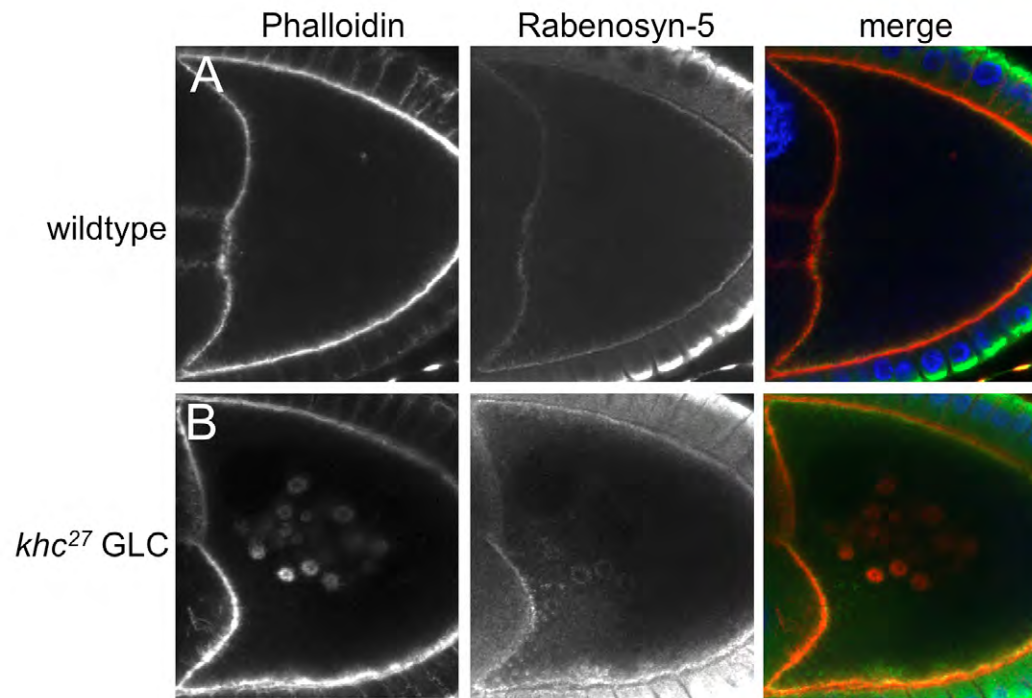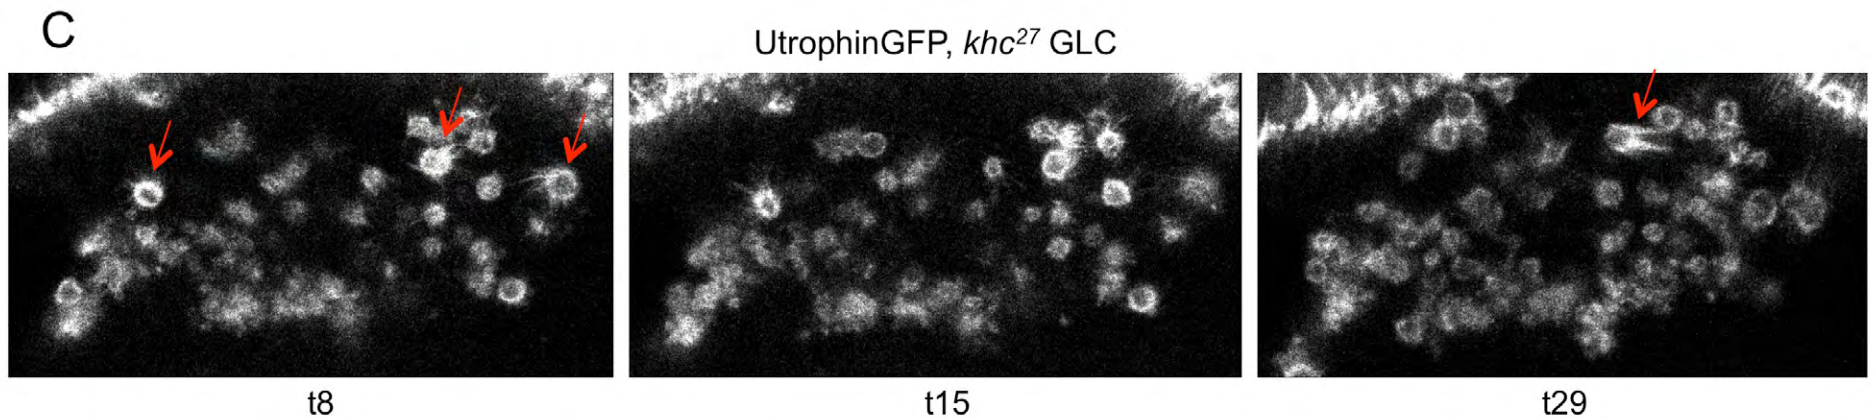

**Fig. S5. Defective actin spheres in *khc* null oocytes correlates with the ectopic presence of the Rab5 effector Rabenosyn-5.** (A,B) F-actin (Phalloidin, white in left panels, red in merge) and Rabenosyn-5 (white in middle panels, green in merge) in wildtype and *khc*<sup>27</sup> st9 oocytes. DAPI (DNA, blue). C) Still frames of a movie of a st9 *khc*<sup>27</sup> oocyte expressing Utrophin-GFP (the actin-binding domain of human Utrophin fused to GFP, and expressed under the *spaghetti-squash* promoter (Rauzi et al., 2010)), showing possible nucleation of actin from aberrantly distributed vesicles.

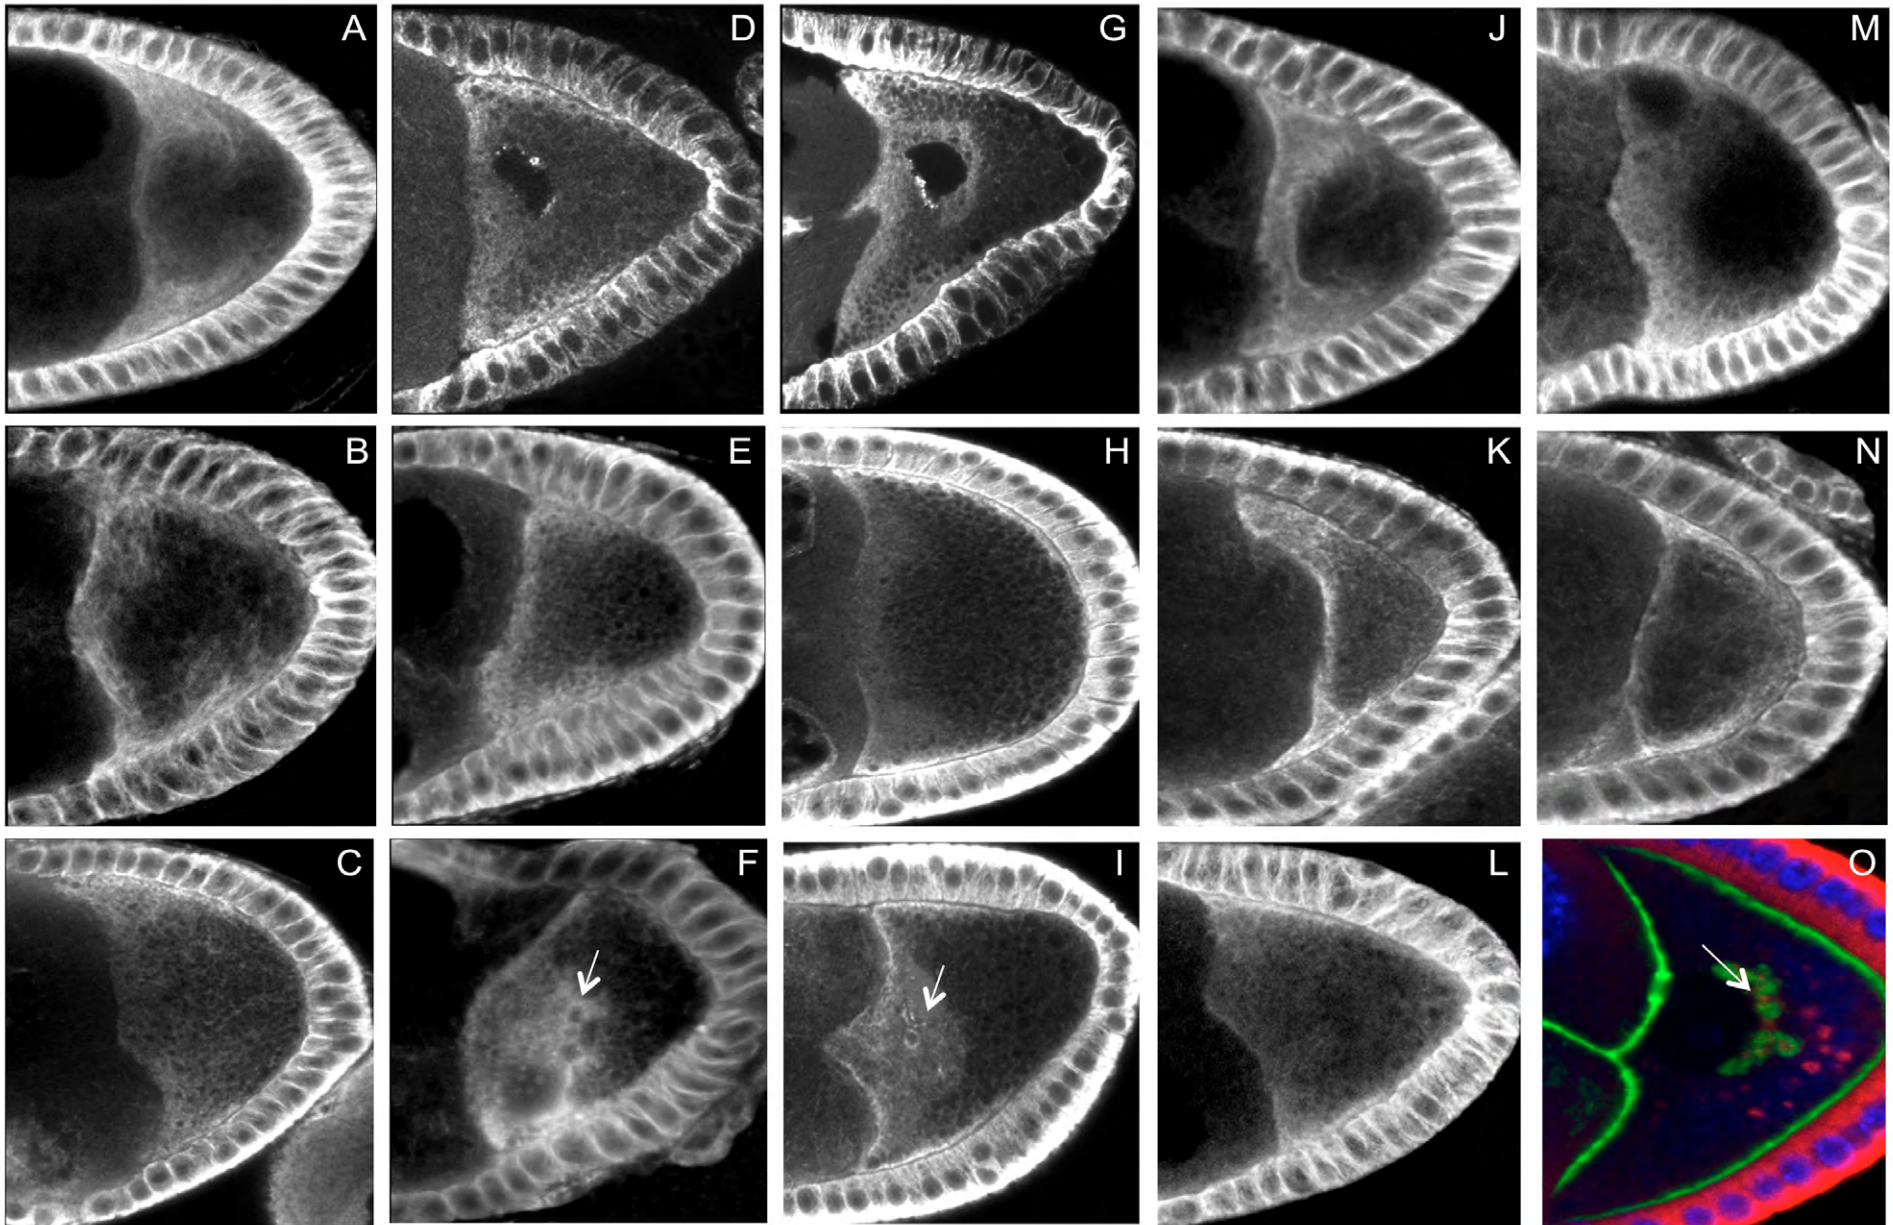

**Fig. S6.** (A-N) Alpha-tubulin in wildtype oocytes (A), or in *khc<sup>27</sup>* oocytes that express KHC1-975 (B,C), KHC1-849 (D-F), KHC1-700 (G-I), KHC1-910 (J,K), KHCΔIAK (L), KHC1-938 (M,N). Tubulin stainings were performed using a FITC-conjugated alpha-tubulin antibody (A,B,D,G,J,L,M), or a rat alpha-tubulin antibody and 568nm-secondary antibody (C,E,F,H,I,K,N). The reason for using both antibodies is that even though the FITC-conjugated antibody renders higher quality images, the signal from the GFP-KHCs is not always gone, as it can be seen in D (dots around the nucleus). (O) Gurken protein (red), Phalloidin (F-actin, green) and DAPI (blue) in KHC1-938 oocytes. 45% of these mutant oocytes show aberrant actin-recruiting vesicles ( $n=11$ )

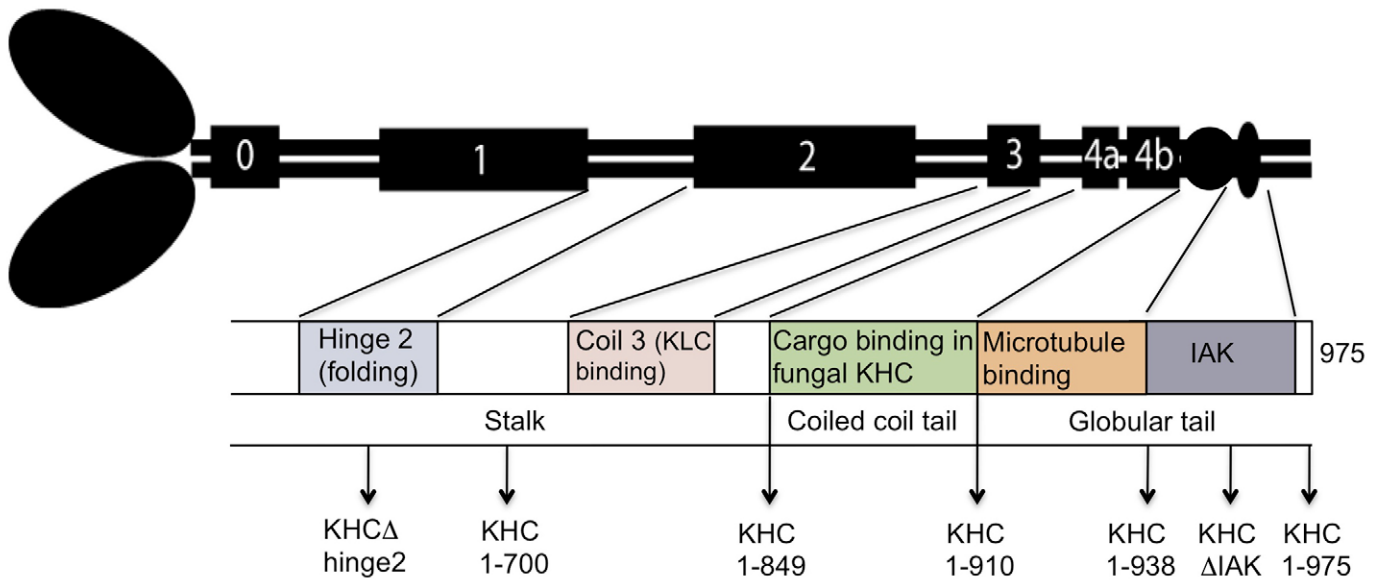

|                                     | KHCΔ hinge2 | KHC 1-700 | KHC 1-849   | KHC 1-910 | KHC 1-938 | KHC ΔIAK | KHC 1-975 |
|-------------------------------------|-------------|-----------|-------------|-----------|-----------|----------|-----------|
| <b>Dynein transport</b>             | nd          | -         | +           | +         | nd        | +        | +         |
| <b>Dynein wildtype localization</b> | nd          | -         | -           | -         | nd        | -        | +         |
| <b>Nucleus positioning</b>          | nd          | -         | - (partial) | partial   | partial   | partial  | +         |
| <b>Dorsal appendages</b>            | +           | -         | -           | -         | -         | -        | +         |
|                                     | (partial)   |           |             |           |           |          |           |
| <b>Actin "vesicles"</b>             | +           | -         | -           | nd        | -         | -        | +         |
| <b>oskar transport</b>              | +           | -         | -           | -         | +         | +        | +         |
| <b>oskar wildtype localization</b>  | -           | -         | -           | -         | -         | -        | +         |
| <b>Stage 9 streaming</b>            | nd          | -         | -           | -         | nd        | +        | +         |

**Fig. S7. Summary of the functional effects of the mutations.** Dynein and *oskar* transport refers to the capacity of the motor to move the cargo from the anterior to the posterior pole. Dynein and *oskar* wildtype localization refers to the posterior crescent. Nd: not defined.

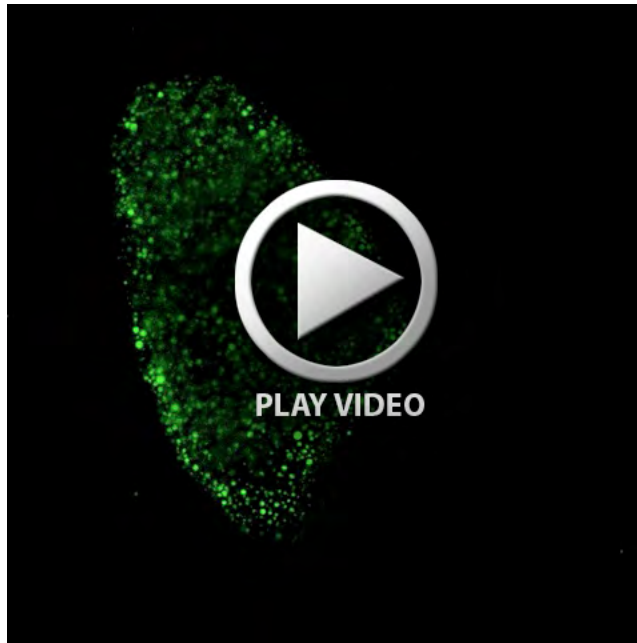

**Movie 1. Cytoplasmic streaming in st11 wild-type oocyte**

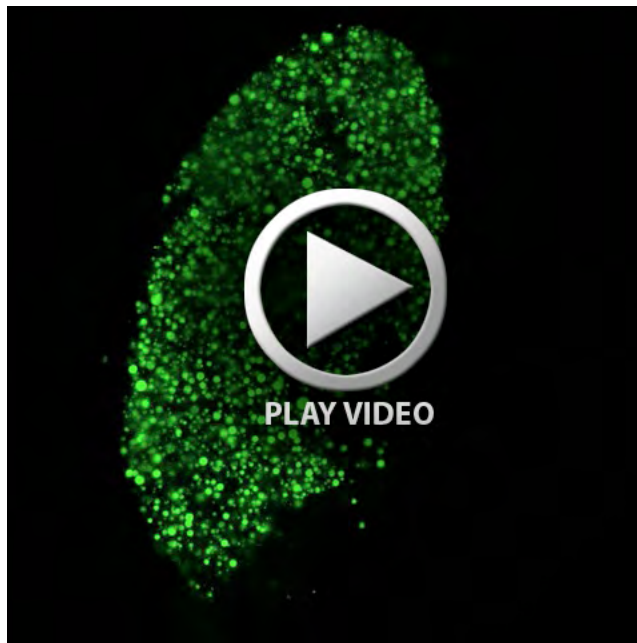

**Movie 2. Cytoplasmic streaming in a st11 KHC1-849 oocyte**
